# Supplementary material
Source: HighWire-hosted journal article supplement (https://injuryprevention.bmj.com/content/ip-2023-045089)
Supplement: inline-supplementary-material-1 [file inline-supplementary-material-1.pdf]

## Appendix

### 1. GATHER Checklist

| Item #                                                                                                | Checklist item Reported on                                                                                                                                                                                                                                                                                                                    | Reported on page #                                                                                                                                                                                                                                                                                                                                                                                                                                                                                                                                                                                                                                                                                                                                                                                                                                                                                                                                                                                                                                                                                                                                                                                                                                                                                                                                                                                                                                                                                     |
|-------------------------------------------------------------------------------------------------------|-----------------------------------------------------------------------------------------------------------------------------------------------------------------------------------------------------------------------------------------------------------------------------------------------------------------------------------------------|--------------------------------------------------------------------------------------------------------------------------------------------------------------------------------------------------------------------------------------------------------------------------------------------------------------------------------------------------------------------------------------------------------------------------------------------------------------------------------------------------------------------------------------------------------------------------------------------------------------------------------------------------------------------------------------------------------------------------------------------------------------------------------------------------------------------------------------------------------------------------------------------------------------------------------------------------------------------------------------------------------------------------------------------------------------------------------------------------------------------------------------------------------------------------------------------------------------------------------------------------------------------------------------------------------------------------------------------------------------------------------------------------------------------------------------------------------------------------------------------------------|
| <b>Objectives and funding</b>                                                                         |                                                                                                                                                                                                                                                                                                                                               |                                                                                                                                                                                                                                                                                                                                                                                                                                                                                                                                                                                                                                                                                                                                                                                                                                                                                                                                                                                                                                                                                                                                                                                                                                                                                                                                                                                                                                                                                                        |
| 1                                                                                                     | Define the indicator(s), populations (including age, sex, and geographic entities), and time period(s) for which estimates were made.                                                                                                                                                                                                         | Main Pg. 2-4, Appendix Pg. 3                                                                                                                                                                                                                                                                                                                                                                                                                                                                                                                                                                                                                                                                                                                                                                                                                                                                                                                                                                                                                                                                                                                                                                                                                                                                                                                                                                                                                                                                           |
| 2                                                                                                     | List the funding sources for the work.                                                                                                                                                                                                                                                                                                        | Appendix Pg. 3                                                                                                                                                                                                                                                                                                                                                                                                                                                                                                                                                                                                                                                                                                                                                                                                                                                                                                                                                                                                                                                                                                                                                                                                                                                                                                                                                                                                                                                                                         |
| <b>Data Inputs</b>                                                                                    |                                                                                                                                                                                                                                                                                                                                               |                                                                                                                                                                                                                                                                                                                                                                                                                                                                                                                                                                                                                                                                                                                                                                                                                                                                                                                                                                                                                                                                                                                                                                                                                                                                                                                                                                                                                                                                                                        |
| <i>For all data inputs from multiple sources that are synthesised as part of the study:</i>           |                                                                                                                                                                                                                                                                                                                                               |                                                                                                                                                                                                                                                                                                                                                                                                                                                                                                                                                                                                                                                                                                                                                                                                                                                                                                                                                                                                                                                                                                                                                                                                                                                                                                                                                                                                                                                                                                        |
| 3                                                                                                     | Describe how the data were identified and how the data were accessed.                                                                                                                                                                                                                                                                         | Main Pg. 2-4, Appendix Pg. 3                                                                                                                                                                                                                                                                                                                                                                                                                                                                                                                                                                                                                                                                                                                                                                                                                                                                                                                                                                                                                                                                                                                                                                                                                                                                                                                                                                                                                                                                           |
| 4                                                                                                     | Specify the inclusion and exclusion criteria. Identify all ad-hoc exclusions.                                                                                                                                                                                                                                                                 | Main Pg. 2                                                                                                                                                                                                                                                                                                                                                                                                                                                                                                                                                                                                                                                                                                                                                                                                                                                                                                                                                                                                                                                                                                                                                                                                                                                                                                                                                                                                                                                                                             |
| 5                                                                                                     | Provide information on all included data sources and their main characteristics. For each data source used, report reference information or contact name/institution, population represented, data collection method, year(s) of data collection, sex and age range, diagnostic criteria or measurement method, and sample size, as relevant. | Main Pg. 2-4<br><a href="http://ghdx.healthdata.org/gbd-2019/datainput-sources">http://ghdx.healthdata.org/gbd-2019/datainput-sources</a>                                                                                                                                                                                                                                                                                                                                                                                                                                                                                                                                                                                                                                                                                                                                                                                                                                                                                                                                                                                                                                                                                                                                                                                                                                                                                                                                                              |
| 6                                                                                                     | Identify and describe any categories of input data that have potentially important biases (e.g., based on characteristics listed in item 5).                                                                                                                                                                                                  | <a href="http://ghdx.healthdata.org/gbd-2019/datainput-sources">http://ghdx.healthdata.org/gbd-2019/datainput-sources</a>                                                                                                                                                                                                                                                                                                                                                                                                                                                                                                                                                                                                                                                                                                                                                                                                                                                                                                                                                                                                                                                                                                                                                                                                                                                                                                                                                                              |
| <i>For data inputs that contribute to the analysis but were not synthesised as part of the study:</i> |                                                                                                                                                                                                                                                                                                                                               |                                                                                                                                                                                                                                                                                                                                                                                                                                                                                                                                                                                                                                                                                                                                                                                                                                                                                                                                                                                                                                                                                                                                                                                                                                                                                                                                                                                                                                                                                                        |
| 7                                                                                                     | Describe and give sources for any other data inputs.                                                                                                                                                                                                                                                                                          | 1.Ministry of water resources of the people's Republic of China. 2019 China water resources bulletin. 2019.<br>2.Compilation Committee of Shanghai Yearbook. Shanghai yearbook 2020[M]. 2020. Shanghai: Shanghai Yearbook Agency<br>3.Guangdong Provincial Bureau of statistics and Guangdong Survey Corps of the National Bureau of Statistics. Guangdong statistical yearbook 2020[M]. 2020. Beijing: China Statistics Press<br>4.Hainan Provincial Bureau of statistics and Hainan Survey Corps of the National Bureau of Statistics. Hainan statistical yearbook 2020[M]. 2020. Beijing: China Statistics Press<br>5.Liaoning Provincial Bureau of statistics and Liaoning Survey Corps of the National Bureau of Statistics. Liaoning statistical yearbook 2020[M]. 2020. Beijing: China Statistics Press<br>6.Guangxi Statistics Bureau. Guangxi statistical yearbook 2020[M] . 2020. Beijing: China Statistics Press<br>7.Tianjin Provincial Bureau of statistics and Tianjin Survey Corps of the National Bureau of Statistics. Tianjin statistical yearbook 2020[M]. 2020. Beijing: China Statistics Press<br>8.Jiangsu Provincial Bureau of statistics and Jiangsu Survey Corps of the National Bureau of Statistics. Jiangsu statistical yearbook 2020[M]. 2020. Beijing: China Statistics Press<br>9.Shandong Provincial Bureau of statistics and Shandong Survey Corps of the National Bureau of Statistics. Shandong statistical yearbook 2020[M]. 2020. Beijing: China Statistics Press |

|                               |                                                                                                                                                                                                                                                                                                                                                                                          |                                                                                                                                                                                                                                                                                                                                                                                                                                                                                                                                                                                                                                                                                                                                                                                                                                                                                                                                                               |
|-------------------------------|------------------------------------------------------------------------------------------------------------------------------------------------------------------------------------------------------------------------------------------------------------------------------------------------------------------------------------------------------------------------------------------|---------------------------------------------------------------------------------------------------------------------------------------------------------------------------------------------------------------------------------------------------------------------------------------------------------------------------------------------------------------------------------------------------------------------------------------------------------------------------------------------------------------------------------------------------------------------------------------------------------------------------------------------------------------------------------------------------------------------------------------------------------------------------------------------------------------------------------------------------------------------------------------------------------------------------------------------------------------|
|                               |                                                                                                                                                                                                                                                                                                                                                                                          | <p>10.Zhejiang Provincial Bureau of statistics and Zhejiang Survey Corps of the National Bureau of Statistics. Zhejiang statistical yearbook 2020[M]. 2020. Beijing: China Statistics Press</p> <p>11.Fujian Provincial Department of culture and Tourism. Reply on proposal No. 20221274 of the fifth session of the 12th CPPCC Provincial Committee. 2022. <a href="http://hyyyj.fujian.gov.cn/xxgk/zfxgk/zfxgkml/tyabl/202204/t20220406_5875496.htm">http://hyyyj.fujian.gov.cn/xxgk/zfxgk/zfxgkml/tyabl/202204/t20220406_5875496.htm</a> (access Jul 25, 2022)</p> <p>12.Hebei Provincial People's Government. Report of Hebei Provincial People's Government on the management of state-owned natural resource assets in the province in 2020. <a href="http://zrzy.hebei.gov.cn/heb/gongk/gkml/gggs/qtgg/xczx/10668449925936603136.html">http://zrzy.hebei.gov.cn/heb/gongk/gkml/gggs/qtgg/xczx/10668449925936603136.html</a> (access Jul 25, 2022)</p> |
| <i>For all data inputs:</i>   |                                                                                                                                                                                                                                                                                                                                                                                          |                                                                                                                                                                                                                                                                                                                                                                                                                                                                                                                                                                                                                                                                                                                                                                                                                                                                                                                                                               |
| 8                             | Provide all data inputs in a file format from which data can be efficiently extracted (e.g., a spreadsheet rather than a PDF), including all relevant metadata listed in item 5. For any data inputs that cannot be shared because of ethical or legal reasons, such as third-party ownership, provide a contact name or the name of the institution that retains the right to the data. | <a href="http://ghdx.healthdata.org/gbd-2019/datainput-sources">http://ghdx.healthdata.org/gbd-2019/datainput-sources</a><br>Appendix Pg. 4-13 Table 1-6                                                                                                                                                                                                                                                                                                                                                                                                                                                                                                                                                                                                                                                                                                                                                                                                      |
| <b>Data analysis</b>          |                                                                                                                                                                                                                                                                                                                                                                                          |                                                                                                                                                                                                                                                                                                                                                                                                                                                                                                                                                                                                                                                                                                                                                                                                                                                                                                                                                               |
| 9                             | Provide a conceptual overview of the data analysis method. A diagram may be helpful.                                                                                                                                                                                                                                                                                                     | Main Pg. 2-4                                                                                                                                                                                                                                                                                                                                                                                                                                                                                                                                                                                                                                                                                                                                                                                                                                                                                                                                                  |
| 10                            | Provide a detailed description of all steps of the analysis, including mathematical formulae. This description should cover, as relevant, data cleaning, data pre-processing, data adjustments and weighting of data sources, and mathematical or statistical model(s).                                                                                                                  | Main Pg. 2-4, Appendix Pg. 3                                                                                                                                                                                                                                                                                                                                                                                                                                                                                                                                                                                                                                                                                                                                                                                                                                                                                                                                  |
| 11                            | Describe how candidate models were evaluated and how the final model(s) were selected.                                                                                                                                                                                                                                                                                                   | N/A                                                                                                                                                                                                                                                                                                                                                                                                                                                                                                                                                                                                                                                                                                                                                                                                                                                                                                                                                           |
| 12                            | Provide the results of an evaluation of model performance, if done, as well as the results of any relevant sensitivity analysis.                                                                                                                                                                                                                                                         | N/A                                                                                                                                                                                                                                                                                                                                                                                                                                                                                                                                                                                                                                                                                                                                                                                                                                                                                                                                                           |
| 13                            | Describe methods for calculating uncertainty of the estimates. State which sources of uncertainty were, and were not, accounted for in the uncertainty analysis.                                                                                                                                                                                                                         | Main Pg. 2-3, Appendix Pg. 3                                                                                                                                                                                                                                                                                                                                                                                                                                                                                                                                                                                                                                                                                                                                                                                                                                                                                                                                  |
| 14                            | State how analytic or statistical source code used to generate estimates can be accessed.                                                                                                                                                                                                                                                                                                | <a href="https://github.com/ihmeuw/ihme-modeling/tree/main/gbd_2019">https://github.com/ihmeuw/ihme-modeling/tree/main/gbd_2019</a>                                                                                                                                                                                                                                                                                                                                                                                                                                                                                                                                                                                                                                                                                                                                                                                                                           |
| <b>Results and Discussion</b> |                                                                                                                                                                                                                                                                                                                                                                                          |                                                                                                                                                                                                                                                                                                                                                                                                                                                                                                                                                                                                                                                                                                                                                                                                                                                                                                                                                               |
| 15                            | Provide published estimates in a file format from which data can be efficiently extracted.                                                                                                                                                                                                                                                                                               | <a href="http://ghdx.healthdata.org/gbd-results-tool">http://ghdx.healthdata.org/gbd-results-tool</a><br>Appendix Pg. 4-13 Table 1-6                                                                                                                                                                                                                                                                                                                                                                                                                                                                                                                                                                                                                                                                                                                                                                                                                          |
| 16                            | Report a quantitative measure of the uncertainty of the estimates (e.g. uncertainty intervals).                                                                                                                                                                                                                                                                                          | Main Pg. 5-6 and figures                                                                                                                                                                                                                                                                                                                                                                                                                                                                                                                                                                                                                                                                                                                                                                                                                                                                                                                                      |
| 17                            | Interpret results in light of existing evidence. If updating a previous set of estimates, describe the reasons for changes in estimates.                                                                                                                                                                                                                                                 | Main Pg. 5-6                                                                                                                                                                                                                                                                                                                                                                                                                                                                                                                                                                                                                                                                                                                                                                                                                                                                                                                                                  |
| 18                            | Discuss limitations of the estimates. Include a discussion of any modelling assumptions or data limitations that affect interpretation of the estimates.                                                                                                                                                                                                                                 | Main Pg. 8-9                                                                                                                                                                                                                                                                                                                                                                                                                                                                                                                                                                                                                                                                                                                                                                                                                                                                                                                                                  |

## 2. Indicator of drowning burden

### Incidence

The data sources of incidence are population-representative data to a certain extent and various research data, such as surveillance system, population survey, life registration data from published papers and unpublished datasets. Disease modelling software DisMod-MR V2.1 estimated the results. For those data with limited representative, the data will be adjusted using HAQ Index and World Health Survey new crosswalks. Data from New Zealand and Georgia inpatient data and the Vietnam National Injury Survey were also used for non-fatal estimation.[1,2,3]

### Mortality

The data source of GBD 2019 is life registration data encoded by the ICD system or household mortality survey. GBD 2019 reclassifies the data with non-specific or unspecified codes and reduces noise. GBD 2019 also smooths the time trend and estimates the uncertainty interval for China and provincial and regional data. While analyzing cause of death data, oral autopsy site data was merged to accommodate small-scale oral autopsy studies, and updates were made when reassigning unclear cause of death codes.[1, 2, 3]

### Disability adjusted life years (DALY)

DALY is an indicator for comprehensively measuring the health loss caused by diseases and injuries. It is the sum of years of life lost (YLLs) and years lived with disability (YLDs) caused by diseases and injuries. Disability weights used for estimating YLDs have been determined through analysis of data from population surveys and an open-access internet survey. In this methodological approach, participants are prompted to discern the comparative health status between randomly paired health states, each delineated by succinct descriptions of their key attributes.[1, 2, 3]

The method used to calculate the uncertainty interval of incidence, mortality and DALYs was reported in the GBD 2019 capstone paper.[1]

## 3. Role of the funding source

The funding source had no involvement in study design, data collection, data analysis, data interpretation, writing of the manuscript, and the decision to submit the manuscript for publication.

## 4. Data sharing

The authors had full access to all the data in the study and had final responsibility to submit for publication. The part of data is publicly available at Global Health Data Exchange (GHDx) online website (<http://ghdx.healthdata.org/gbd-results-tool>) and additional data could be requested from IHME.

## References:

1. GBD 2019 Diseases and Injuries Collaborators. Global burden of 369 diseases and injuries in 204 countries and territories, 1990–2019: a systematic analysis for the Global Burden of Disease Study 2019. *Lancet* 2020; 396:1204–22. doi:10.1016/S0140-6736(20)30925-9
2. James SL, Castle CD, Dingels ZV, Fox JT, Hamilton EB, Liu Z, et al. Estimating global injuries morbidity and mortality: methods and data used in the Global Burden of Disease 2017 study. *Inj Prev* 2020; 26:i125–i53. doi: 10.1136/injuryprev-2019-043531
3. GBD 2019 Risk Factors Collaborators. Global burden of 87 risk factors in 204 countries and territories, 1990–2019: a systematic analysis for the Global Burden of Disease Study 2019. *Lancet* 2020; 396:1223–49. doi: 10.1016/S0140-6736(20)30752-2

**Table 1 Age-standardized Incidence, DALY rate, Mortality rate of unintentional drowning in China by sex, 1990-2019**

| Year | Age-standardized Incidence rate per 100,000 (95% UI) |                      |                      | Age-standardized DALY rate per 100,000 (95% UI) |                           |                         | Age-standardized Mortality rate per 100,000 (95% UI) |                      |                    |
|------|------------------------------------------------------|----------------------|----------------------|-------------------------------------------------|---------------------------|-------------------------|------------------------------------------------------|----------------------|--------------------|
|      | Both                                                 | Male                 | Female               | Both                                            | Male                      | Female                  | Both                                                 | Male                 | Female             |
| 1990 | 21.78 (17.99, 26.07)                                 | 26.36 (21.61, 31.86) | 16.64 (13.85, 19.60) | 955.5 (829.81, 1058.59)                         | 1183.42 (956.54, 1328.49) | 710.62 (618.08, 799.51) | 13.62 (11.94, 15.08)                                 | 16.79 (13.69, 18.96) | 10.24 (8.95, 11.5) |
| 1991 | 21.75 (18.13, 25.82)                                 | 26.16 (21.56, 31.36) | 16.74 (14.07, 19.67) | 929.61 (816.52, 1029.7)                         | 1155.16 (952.15, 1296.56) | 686.44 (600.94, 769.80) | 13.24 (11.67, 14.62)                                 | 16.38 (13.70, 18.50) | 9.89 (8.76, 11.10) |
| 1992 | 21.67 (18.24, 25.50)                                 | 25.90 (21.58, 30.85) | 16.83 (14.21, 19.81) | 893.57 (778.93, 979.17)                         | 1115.07 (912.60, 1242.95) | 653.99 (577.57, 724.26) | 12.73 (11.27, 13.90)                                 | 15.81 (13.02, 17.71) | 9.44 (8.46, 10.40) |
| 1993 | 21.57 (18.18, 25.31)                                 | 25.59 (21.47, 30.25) | 16.92 (14.33, 19.84) | 875.54 (770.88, 962.63)                         | 1092.34 (882.39, 1206.80) | 640.41 (565.81, 711.65) | 12.50 (11.17, 13.64)                                 | 15.52 (12.74, 17.17) | 9.27 (8.29, 10.27) |
| 1994 | 21.45 (18.13, 25.10)                                 | 25.26 (21.25, 29.78) | 17.00 (14.44, 19.85) | 859.03 (741.21, 941.91)                         | 1062.23 (866.20, 1175.19) | 638.05 (566.38, 709.58) | 12.24 (10.79, 13.37)                                 | 15.09 (12.35, 16.70) | 9.18 (8.22, 10.17) |
| 1995 | 21.31 (18.05, 24.85)                                 | 24.93 (21.08, 29.28) | 17.05 (14.53, 19.89) | 843.41 (735.27, 919.12)                         | 1030.91 (844.08, 1135.35) | 639.04 (567.80, 704.29) | 12.02 (10.70, 13.00)                                 | 14.68 (12.16, 16.15) | 9.18 (8.28, 10.07) |
| 1996 | 21.11 (17.93, 24.57)                                 | 24.46 (20.70, 28.57) | 17.12 (14.61, 19.93) | 813.36 (717.19, 882.74)                         | 997.77 (823.49, 1092.91)  | 611.77 (548.77, 670.80) | 11.63 (10.42, 12.55)                                 | 14.25 (11.96, 15.60) | 8.82 (7.99, 9.66)  |
| 1997 | 20.79 (17.72, 24.16)                                 | 23.74 (20.14, 27.74) | 17.22 (14.67, 20.02) | 781.12 (685.53, 850.89)                         | 962.84 (800.08, 1059.96)  | 581.82 (520.59, 633.25) | 11.19 (10.03, 12.09)                                 | 13.77 (11.47, 15.10) | 8.41 (7.67, 9.09)  |
| 1998 | 20.39 (17.38, 23.73)                                 | 22.87 (19.41, 26.75) | 17.32 (14.74, 20.15) | 761.50 (671.52, 827.88)                         | 936.97 (783.99, 1026.77)  | 568.49 (513.15, 625.76) | 10.96 (9.82, 11.83)                                  | 13.47 (11.43, 14.69) | 8.26 (7.53, 9.03)  |
| 1999 | 19.95 (16.97, 23.21)                                 | 21.94 (18.58, 25.68) | 17.38 (14.79, 20.27) | 723.08 (644.51, 786.67)                         | 898.36 (760.18, 983.29)   | 529.49 (477.73, 582.52) | 10.48 (9.47, 11.31)                                  | 12.99 (11.03, 14.18) | 7.77 (7.08, 8.48)  |
| 2000 | 19.49 (16.60, 22.66)                                 | 21.06 (17.83, 24.72) | 17.39 (14.79, 20.26) | 693.70 (615.56, 754.30)                         | 870.02 (722.78, 951.32)   | 498.49 (455.54, 543.09) | 10.17 (9.17, 10.96)                                  | 12.70 (10.69, 13.84) | 7.43 (6.84, 8.04)  |
| 2001 | 19.02 (16.18, 22.08)                                 | 20.14 (17.05, 23.68) | 17.38 (14.80, 20.28) | 653.54 (574.67, 708.09)                         | 829.22 (693.76, 903.25)   | 458.63 (419.39, 500.38) | 9.70 (8.64, 10.42)                                   | 12.23 (10.23, 13.34) | 6.95 (6.41, 7.50)  |
| 2002 | 18.51 (15.78, 21.51)                                 | 19.11 (16.17, 22.41) | 17.42 (14.85, 20.25) | 613.15 (551.47, 662.95)                         | 791.98 (666.79, 863.65)   | 414.51 (381.09, 454.11) | 9.27 (8.46, 10.03)                                   | 11.86 (9.96, 12.96)  | 6.47 (5.97, 7.07)  |
| 2003 | 17.99 (15.35, 20.93)                                 | 18.04 (15.28, 21.12) | 17.46 (14.88, 20.24) | 563.01 (504.88, 607.36)                         | 743.36 (630.46, 811.05)   | 362.38 (333.42, 394.21) | 8.70 (7.88, 9.39)                                    | 11.31 (9.56, 12.36)  | 5.86 (5.43, 6.39)  |
| 2004 | 17.46 (14.87, 20.29)                                 | 17.02 (14.38, 19.94) | 17.44 (14.83, 20.20) | 533.39 (472.41, 576.15)                         | 709.67 (591.56, 772.02)   | 336.94 (310.89, 366.47) | 8.35 (7.51, 8.98)                                    | 10.94 (9.00, 11.91)  | 5.55 (5.12, 6.00)  |
| 2005 | 16.93 (14.37, 19.70)                                 | 16.12 (13.60, 18.88) | 17.32 (14.74, 20.13) | 499.44 (447.63, 543.54)                         | 665.23 (564.03, 730.57)   | 314.24 (291.66, 340.70) | 7.93 (7.15, 8.62)                                    | 10.38 (8.70, 11.39)  | 5.27 (4.89, 5.73)  |
| 2006 | 16.35 (13.87, 19.03)                                 | 15.25 (12.87, 17.87) | 17.06 (14.51, 19.80) | 457.66 (403.83, 494.95)                         | 613.05 (514.43, 673.04)   | 283.62 (261.75, 307.04) | 7.30 (6.56, 7.87)                                    | 9.60 (8.10, 10.53)   | 4.80 (4.44, 5.19)  |
| 2007 | 15.69 (13.32, 18.27)                                 | 14.32 (12.11, 16.80) | 16.70 (14.25, 19.39) | 434.31 (391.00, 471.53)                         | 582.22 (499.46, 639.00)   | 268.31 (244.95, 292.38) | 7.00 (6.35, 7.61)                                    | 9.19 (7.84, 10.11)   | 4.62 (4.22, 5.04)  |
| 2008 | 15.06 (12.79, 17.50)                                 | 13.46 (11.39, 15.73) | 16.33 (13.97, 18.92) | 419.41 (377.45, 455.29)                         | 566.74 (489.35, 622.53)   | 253.62 (235.54, 273.25) | 6.76 (6.10, 7.29)                                    | 8.96 (7.63, 9.85)    | 4.37 (4.03, 4.70)  |
| 2009 | 14.55 (12.38, 16.92)                                 | 12.78 (10.82, 14.91) | 16.01 (13.69, 18.59) | 416.03 (374.51, 447.31)                         | 565.47 (485.83, 615.34)   | 247.36 (229.88, 265.39) | 6.70 (6.04, 7.20)                                    | 8.94 (7.51, 9.71)    | 4.27 (3.97, 4.61)  |
| 2010 | 14.26 (12.13, 16.56)                                 | 12.39 (10.47, 14.44) | 15.84 (13.53, 18.41) | 396.15 (358.06, 428.36)                         | 537.3 (462.35, 589.61)    | 236.87 (220.22, 255.66) | 6.45 (5.82, 6.95)                                    | 8.59 (7.20, 9.42)    | 4.14 (3.84, 4.47)  |
| 2011 | 14.17 (12.07, 16.46)                                 | 12.24 (10.39, 14.28) | 15.79 (13.50, 18.32) | 366.07 (323.47, 394.86)                         | 497.61 (425.59, 545.81)   | 217.47 (200.43, 235.21) | 6.01 (5.32, 6.46)                                    | 8.03 (6.63, 8.81)    | 3.83 (3.50, 4.20)  |
| 2012 | 14.15 (12.07, 16.43)                                 | 12.20 (10.36, 14.22) | 15.80 (13.52, 18.30) | 348.22 (310.88, 378.05)                         | 475.70 (407.16, 521.38)   | 204.10 (189.98, 219.49) | 5.78 (5.13, 6.25)                                    | 7.77 (6.49, 8.55)    | 3.65 (3.37, 3.95)  |
| 2013 | 14.18 (12.12, 16.47)                                 | 12.20 (10.38, 14.20) | 15.84 (13.54, 18.34) | 329.49 (295.45, 356.87)                         | 452.27 (392.57, 498.03)   | 190.86 (176.04, 205.94) | 5.51 (4.83, 5.92)                                    | 7.45 (6.14, 8.22)    | 3.44 (3.15, 3.75)  |
| 2014 | 14.20 (12.17, 16.48)                                 | 12.21 (10.38, 14.19) | 15.86 (13.55, 18.39) | 314.33 (281.83, 342.94)                         | 432.24 (369.72, 479.34)   | 181.48 (167.85, 197.02) | 5.33 (4.69, 5.82)                                    | 7.21 (5.86, 8.01)    | 3.34 (3.04, 3.64)  |
| 2015 | 14.17 (12.12, 16.46)                                 | 12.18 (10.35, 14.17) | 15.84 (13.53, 18.37) | 296.45 (264.01, 328.42)                         | 410.65 (345.72, 462.83)   | 167.94 (153.13, 184.20) | 5.10 (4.49, 5.60)                                    | 6.93 (5.54, 7.84)    | 3.15 (2.82, 3.51)  |
| 2016 | 14.22 (11.98, 16.67)                                 | 12.17 (10.23, 14.33) | 15.98 (13.48, 18.76) | 283.58 (252.39, 316.30)                         | 393.61 (335.99, 445.07)   | 159.94 (143.82, 177.09) | 4.94 (4.33, 5.45)                                    | 6.72 (5.52, 7.60)    | 3.05 (2.69, 3.42)  |
| 2017 | 14.38 (11.95, 17.03)                                 | 12.27 (10.17, 14.68) | 16.25 (13.46, 19.30) | 267.14 (234.02, 296.28)                         | 370.81 (313.33, 422.15)   | 150.84 (136.13, 168.00) | 4.69 (4.05, 5.17)                                    | 6.37 (5.09, 7.23)    | 2.90 (2.58, 3.28)  |

| Year | Age-standardized Incidence rate per 100,000 (95% UI) |                      |                      | Age-standardized DALY rate per 100,000 (95% UI) |                         |                         | Age-standardized Mortality rate per 100,000 (95% UI) |                   |                   |
|------|------------------------------------------------------|----------------------|----------------------|-------------------------------------------------|-------------------------|-------------------------|------------------------------------------------------|-------------------|-------------------|
|      | Both                                                 | Male                 | Female               | Both                                            | Male                    | Female                  | Both                                                 | Male              | Female            |
| 2018 | 14.62 (12.13, 17.36)                                 | 12.48 (10.36, 14.94) | 16.52 (13.69, 19.65) | 253.44 (221.46, 283.12)                         | 351.97 (298.31, 402.18) | 142.95 (127.75, 161.03) | 4.48 (3.86, 5.01)                                    | 6.08 (4.83, 7.03) | 2.78 (2.44, 3.18) |
| 2019 | 14.98 (12.47, 17.82)                                 | 12.80 (10.59, 15.36) | 16.88 (14.01, 20.11) | 239.89 (208.93, 268.23)                         | 334.19 (278.89, 383.82) | 134.11 (118.23, 151.95) | 4.28 (3.68, 4.81)                                    | 5.82 (4.67, 6.77) | 2.64 (2.26, 3.07) |

**Table 2 Incidence, DALY rate, Mortality rate of unintentional drowning in China by age and sex in 2019**

| Age group        | Incidence rate per 100,000 (95% UI) |                      |                       | DALY rate per 100,000 (95% UI) |                         |                         | Mortality rate per 100,000 (95% UI) |                      |                      |
|------------------|-------------------------------------|----------------------|-----------------------|--------------------------------|-------------------------|-------------------------|-------------------------------------|----------------------|----------------------|
|                  | Both                                | Male                 | Female                | Both                           | Male                    | Female                  | Both                                | Male                 | Female               |
| Under 5          | 12.66 (9.40, 17.03)                 | 10.34 (7.66, 13.91)  | 15.37 (11.42, 20.57)  | 531.56 (446.14, 630.85)        | 615.53 (500.78, 753.13) | 433.62 (366.82, 507.53) | 6.17 (5.17, 7.32)                   | 7.14 (5.81, 8.74)    | 5.03 (4.25, 5.89)    |
| 5 to 9           | 12.82 (8.98, 17.72)                 | 11.31 (7.95, 15.52)  | 14.59 (10.12, 20.16)  | 473.46 (414.86, 547.31)        | 684.97 (593.59, 803.75) | 224.56 (201.22, 254.60) | 5.79 (5.07, 6.69)                   | 8.38 (7.26, 9.83)    | 2.74 (2.45, 3.11)    |
| 10 to 14         | 12.12 (8.12, 17.07)                 | 10.81 (7.38, 15.10)  | 13.67 (9.04, 19.48)   | 388.23 (338.41, 439.71)        | 583.69 (495.28, 678.44) | 156.58 (134.31, 180.70) | 5.07 (4.42, 5.75)                   | 7.64 (6.48, 8.88)    | 2.04 (1.75, 2.35)    |
| 15 to 19         | 12.41 (8.27, 18.03)                 | 12.12 (8.10, 17.56)  | 12.73 (8.39, 18.61)   | 289.69 (227.83, 346.59)        | 458.79 (344.01, 561.97) | 96.19 (80.66, 112.37)   | 4.05 (3.18, 4.84)                   | 6.42 (4.81, 7.86)    | 1.33 (1.11, 1.55)    |
| 20 to 24         | 12.60 (8.53, 17.99)                 | 12.78 (8.74, 17.99)  | 12.40 (8.17, 18.15)   | 215.46 (167.94, 260.33)        | 348.89 (253.63, 433.15) | 69.52 (53.69, 86.66)    | 3.22 (2.50, 3.90)                   | 5.23 (3.79, 6.49)    | 1.02 (0.79, 1.28)    |
| 25 to 29         | 12.47 (8.41, 18.45)                 | 12.99 (9.07, 19.10)  | 11.93 (7.76, 17.83)   | 136.05 (101.99, 158.58)        | 216.17 (151.04, 258.98) | 52.98 (39.33, 68.21)    | 2.18 (1.62, 2.55)                   | 3.49 (2.42, 4.18)    | 0.83 (0.62, 1.08)    |
| 30 to 34         | 12.28 (8.18, 17.44)                 | 12.90 (8.67, 18.21)  | 11.65 (7.68, 16.68)   | 119.30 (93.71, 141.10)         | 182.41 (131.17, 222.55) | 54.70 (41.93, 70.87)    | 2.07 (1.63, 2.46)                   | 3.19 (2.29, 3.90)    | 0.93 (0.70, 1.21)    |
| 35 to 39         | 11.91 (7.99, 17.10)                 | 12.69 (8.57, 18.06)  | 11.10 (7.25, 16.36)   | 110.72 (86.47, 132.27)         | 163.64 (116.03, 200.46) | 55.77 (43.18, 70.88)    | 2.10 (1.63, 2.52)                   | 3.13 (2.21, 3.84)    | 1.04 (0.79, 1.33)    |
| 40 to 44         | 11.33 (7.48, 16.33)                 | 12.08 (8.09, 17.10)  | 10.56 (6.84, 15.68)   | 111.08 (88.62, 134.13)         | 156.02 (113.97, 196.76) | 64.22 (49.60, 81.46)    | 2.32 (1.85, 2.81)                   | 3.29 (2.40, 4.15)    | 1.32 (1.01, 1.69)    |
| 45 to 49         | 11.23 (7.57, 16.24)                 | 11.51 (7.88, 16.55)  | 10.94 (7.22, 16.03)   | 94.87 (73.95, 114.70)          | 125.42 (87.28, 161.12)  | 63.13 (48.48, 80.02)    | 2.20 (1.69, 2.67)                   | 2.93 (2.03, 3.79)    | 1.44 (1.10, 1.86)    |
| 50 to 54         | 11.26 (7.34, 16.48)                 | 10.86 (7.17, 15.81)  | 11.68 (7.51, 17.41)   | 97.54 (77.44, 118.28)          | 125.72 (87.62, 162.30)  | 69.09 (53.70, 86.99)    | 2.55 (2.02, 3.11)                   | 3.31 (2.28, 4.28)    | 1.78 (1.37, 2.26)    |
| 55 to 59         | 12.56 (8.25, 18.30)                 | 10.54 (7.05, 15.28)  | 14.59 (9.57, 21.47)   | 97.12 (77.41, 116.07)          | 123.90 (85.69, 158.22)  | 70.08 (54.34, 87.77)    | 2.89 (2.29, 3.48)                   | 3.72 (2.54, 4.79)    | 2.05 (1.56, 2.60)    |
| 60 to 64         | 15.65 (10.39, 22.88)                | 10.88 (7.35, 15.69)  | 20.46 (13.53, 30.20)  | 109.43 (88.45, 130.04)         | 128.86 (89.63, 163.13)  | 89.81 (70.34, 112.41)   | 3.78 (3.02, 4.54)                   | 4.49 (3.09, 5.72)    | 3.06 (2.37, 3.87)    |
| 65 to 69         | 21.56 (14.85, 31.21)                | 12.73 (8.64, 18.41)  | 30.07 (20.59, 43.69)  | 120.82 (96.66, 141.86)         | 134.31 (86.17, 168.37)  | 107.81 (85.75, 133.35)  | 4.95 (3.90, 5.88)                   | 5.56 (3.49, 7.03)    | 4.36 (3.44, 5.45)    |
| 70 to 74         | 30.49 (20.60, 42.78)                | 17.08 (11.60, 24.36) | 43.25 (29.35, 60.52)  | 153.51 (122.2, 179.35)         | 168.18 (105.3, 212.73)  | 139.55 (112.44, 170.40) | 7.66 (6.03, 9.05)                   | 8.52 (5.23, 10.82)   | 6.84 (5.44, 8.49)    |
| 75 to 79         | 43.50 (29.93, 61.09)                | 24.58 (17.13, 34.16) | 60.53 (41.64, 84.12)  | 174.72 (141.63, 202.16)        | 187.66 (121.7, 231.95)  | 163.07 (130.64, 199.08) | 10.91 (8.72, 12.75)                 | 11.95 (7.63, 14.89)  | 9.98 (7.83, 12.39)   |
| 80 plus          | 77.33 (57.72, 104.55)               | 42.21 (31.35, 57.75) | 99.71 (73.67, 135.37) | 234.63 (193.01, 268.09)        | 259.14 (178.46, 305.73) | 219.02 (177.33, 262.68) | 21.44 (17.58, 24.88)                | 24.06 (16.23, 28.64) | 19.76 (15.61, 24.04) |
| Age-standardized | 14.98 (12.47, 17.82)                | 12.80 (10.59, 15.36) | 16.88 (14.01, 20.11)  | 239.89 (208.93, 268.23)        | 334.19 (278.89, 383.82) | 134.11 (118.23, 151.95) | 4.28 (3.68, 4.81)                   | 5.82 (4.67, 6.77)    | 2.64 (2.26, 3.07)    |

**Table 3 Incidence, DALY rate, Mortality rate of unintentional drowning in China by age and sex in 2019**

| Year | <20 years (per 100,000 (95% UI)) |                            |                      | 70+ years (per 100,000 (95% UI)) |                         |                      | Total (per 100,000 (95% UI)) |                          |                      |
|------|----------------------------------|----------------------------|----------------------|----------------------------------|-------------------------|----------------------|------------------------------|--------------------------|----------------------|
|      | Incidence rate                   | DALY rate                  | Mortality rate       | Incidence rate                   | DALY rate               | Mortality rate       | Incidence rate               | DALY rate                | Mortality rate       |
| 1990 | 32.28 (24.50, 41.36)             | 2101.23 (1808.31, 2359.51) | 25.49 (22.02, 28.55) | 20.54 (15.02, 27.75)             | 241.94 (211.36, 288.93) | 15.60 (13.53, 18.64) | 21.78 (17.99, 26.07)         | 955.50 (829.81, 1058.59) | 13.62 (11.94, 15.08) |
| 1991 | 32.78 (25.21, 41.69)             | 2071.85 (1801.17, 2309.73) | 25.12 (21.90, 28.02) | 21.47 (15.93, 28.63)             | 237.38 (210.30, 284.40) | 15.34 (13.54, 18.45) | 21.75 (18.13, 25.82)         | 929.61 (816.52, 1029.70) | 13.24 (11.67, 14.62) |
| 1992 | 33.06 (25.70, 41.77)             | 2005.14 (1729.65, 2212.64) | 24.31 (21.05, 26.83) | 22.40 (16.85, 29.65)             | 228.70 (202.56, 268.56) | 14.81 (13.13, 17.43) | 21.67 (18.24, 25.50)         | 893.57 (778.93, 979.17)  | 12.73 (11.27, 13.90) |
| 1993 | 33.12 (25.95, 41.54)             | 1964.16 (1710.81, 2178.95) | 23.83 (20.80, 26.41) | 23.32 (17.75, 30.68)             | 228.56 (204.83, 267.71) | 14.84 (13.31, 17.47) | 21.57 (18.18, 25.31)         | 875.54 (770.88, 962.63)  | 12.50 (11.17, 13.64) |
| 1994 | 32.97 (25.92, 41.22)             | 1919.93 (1652.65, 2123.23) | 23.33 (20.09, 25.78) | 24.19 (18.56, 31.53)             | 218.82 (197.22, 250.55) | 14.21 (12.81, 16.40) | 21.45 (18.13, 25.10)         | 859.03 (741.21, 941.91)  | 12.24 (10.79, 13.37) |
| 1995 | 32.62 (25.72, 40.70)             | 1868.23 (1618.61, 2053.63) | 22.75 (19.72, 24.97) | 25.03 (19.36, 32.26)             | 215.13 (194.73, 247.54) | 13.98 (12.61, 16.07) | 21.31 (18.05, 24.85)         | 843.41 (735.27, 919.12)  | 12.02 (10.70, 13.00) |
| 1996 | 31.90 (25.20, 39.88)             | 1778.75 (1545.51, 1948.67) | 21.70 (18.92, 23.74) | 25.87 (20.02, 33.30)             | 212.63 (192.54, 244.42) | 13.87 (12.50, 15.97) | 21.11 (17.93, 24.57)         | 813.36 (717.19, 882.74)  | 11.63 (10.42, 12.55) |
| 1997 | 30.75 (24.32, 38.54)             | 1684.58 (1466.45, 1854.76) | 20.60 (18.00, 22.64) | 26.74 (20.72, 34.43)             | 206.57 (189.31, 232.52) | 13.52 (12.31, 15.25) | 20.79 (17.72, 24.16)         | 781.12 (685.53, 850.89)  | 11.19 (10.03, 12.09) |
| 1998 | 29.36 (23.13, 36.87)             | 1610.06 (1416.27, 1759.43) | 19.74 (17.38, 21.54) | 27.64 (21.46, 35.62)             | 206.61 (187.30, 234.70) | 13.56 (12.25, 15.52) | 20.39 (17.38, 23.73)         | 761.50 (671.52, 827.88)  | 10.96 (9.82, 11.83)  |
| 1999 | 27.92 (21.84, 35.05)             | 1500.08 (1323.85, 1639.85) | 18.45 (16.30, 20.13) | 28.59 (22.23, 36.91)             | 205.60 (187.60, 231.87) | 13.52 (12.30, 15.33) | 19.95 (16.97, 23.21)         | 723.08 (644.51, 786.67)  | 10.48 (9.47, 11.31)  |
| 2000 | 26.58 (20.70, 33.48)             | 1408.80 (1240.96, 1538.02) | 17.38 (15.30, 18.94) | 29.55 (23.00, 38.07)             | 213.79 (196.30, 237.75) | 14.11 (12.95, 15.77) | 19.49 (16.60, 22.66)         | 693.70 (615.56, 754.30)  | 10.17 (9.17, 10.96)  |
| 2001 | 25.24 (19.65, 31.79)             | 1299.82 (1136.55, 1413.51) | 16.08 (14.00, 17.47) | 30.76 (23.96, 39.54)             | 218.07 (198.70, 238.49) | 14.46 (13.15, 15.86) | 19.02 (16.18, 22.08)         | 653.54 (574.67, 708.09)  | 9.70 (8.64, 10.42)   |
| 2002 | 23.77 (18.48, 30.05)             | 1189.57 (1061.71, 1290.22) | 14.75 (13.08, 16.02) | 32.24 (25.20, 41.40)             | 229.95 (209.67, 253.47) | 15.31 (13.86, 16.94) | 18.51 (15.78, 21.51)         | 613.15 (551.47, 662.95)  | 9.27 (8.46, 10.03)   |
| 2003 | 22.28 (17.28, 28.34)             | 1067.62 (944.33, 1154.86)  | 13.28 (11.75, 14.34) | 33.78 (26.29, 43.22)             | 238.54 (216.44, 261.37) | 15.90 (14.39, 17.60) | 17.99 (15.35, 20.93)         | 563.01 (504.88, 607.36)  | 8.70 (7.88, 9.39)    |
| 2004 | 20.88 (16.16, 26.63)             | 995.14 (878.98, 1075.77)   | 12.39 (10.98, 13.40) | 35.10 (27.35, 44.96)             | 242.40 (214.86, 262.12) | 16.19 (14.29, 17.55) | 17.46 (14.87, 20.29)         | 533.39 (472.41, 576.15)  | 8.35 (7.51, 8.98)    |
| 2005 | 19.68 (15.19, 25.18)             | 920.85 (818.92, 1005.34)   | 11.48 (10.26, 12.53) | 36.00 (28.05, 45.96)             | 242.58 (216.02, 264.40) | 16.30 (14.50, 17.73) | 16.93 (14.37, 19.70)         | 499.44 (447.63, 543.54)  | 7.93 (7.15, 8.62)    |
| 2006 | 18.53 (14.31, 23.61)             | 841.87 (744.01, 916.95)    | 10.49 (9.29, 11.43)  | 36.50 (28.50, 46.65)             | 225.78 (199.56, 244.03) | 15.19 (13.33, 16.43) | 16.35 (13.87, 19.03)         | 457.66 (403.83, 494.95)  | 7.30 (6.56, 7.87)    |
| 2007 | 17.32 (13.38, 21.99)             | 797.32 (711.29, 869.56)    | 9.93 (8.88, 10.83)   | 36.87 (28.85, 47.20)             | 222.72 (199.04, 243.43) | 15.09 (13.38, 16.50) | 15.69 (13.32, 18.27)         | 434.31 (391.00, 471.53)  | 7.00 (6.35, 7.61)    |
| 2008 | 16.17 (12.49, 20.46)             | 778.78 (699.50, 848.50)    | 9.70 (8.73, 10.58)   | 37.24 (29.21, 47.64)             | 212.86 (186.63, 230.42) | 14.48 (12.67, 15.71) | 15.06 (12.79, 17.50)         | 419.41 (377.45, 455.29)  | 6.76 (6.10, 7.29)    |
| 2009 | 15.23 (11.74, 19.31)             | 785.99 (706.31, 847.23)    | 9.80 (8.81, 10.56)   | 37.69 (29.55, 48.09)             | 210.43 (182.84, 228.12) | 14.43 (12.54, 15.67) | 14.55 (12.38, 16.92)         | 416.03 (374.51, 447.31)  | 6.70 (6.04, 7.20)    |
| 2010 | 14.62 (11.27, 18.54)             | 752.27 (674.48, 813.68)    | 9.38 (8.43, 10.16)   | 38.27 (29.97, 48.97)             | 210.31 (181.82, 227.92) | 14.51 (12.43, 15.73) | 14.26 (12.13, 16.56)         | 396.15 (358.06, 428.36)  | 6.45 (5.82, 6.95)    |
| 2011 | 14.27 (11.03, 18.08)             | 699.69 (622.93, 757.86)    | 8.72 (7.78, 9.43)    | 39.27 (30.80, 50.25)             | 200.76 (168.81, 220.23) | 13.86 (11.65, 15.17) | 14.17 (12.07, 16.46)         | 366.07 (323.47, 394.86)  | 6.01 (5.32, 6.46)    |
| 2012 | 14.00 (10.84, 17.69)             | 665.69 (598.31, 723.64)    | 8.29 (7.46, 9.02)    | 40.74 (31.98, 52.13)             | 199.96 (169.81, 217.70) | 13.79 (11.70, 15.05) | 14.15 (12.07, 16.43)         | 348.22 (310.88, 378.05)  | 5.78 (5.13, 6.25)    |
| 2013 | 13.77 (10.68, 17.40)             | 628.40 (562.66, 686.26)    | 7.83 (7.01, 8.54)    | 42.40 (33.40, 54.23)             | 195.27 (162.19, 214.50) | 13.46 (11.14, 14.84) | 14.18 (12.12, 16.47)         | 329.49 (295.45, 356.87)  | 5.51 (4.83, 5.92)    |
| 2014 | 13.53 (10.52, 17.16)             | 591.43 (532.83, 647.97)    | 7.37 (6.65, 8.07)    | 43.94 (34.76, 56.27)             | 198.24 (168.58, 218.19) | 13.70 (11.61, 15.10) | 14.20 (12.17, 16.48)         | 314.33 (281.83, 342.94)  | 5.33 (4.69, 5.82)    |
| 2015 | 13.25 (10.30, 16.86)             | 549.36 (490.62, 607.57)    | 6.85 (6.13, 7.57)    | 44.96 (35.59, 57.88)             | 197.06 (165.97, 218.22) | 13.60 (11.37, 15.12) | 14.17 (12.12, 16.46)         | 296.45 (264.01, 328.42)  | 5.10 (4.49, 5.60)    |
| 2016 | 12.76 (9.72, 16.58)              | 517.07 (463.45, 576.91)    | 6.45 (5.77, 7.19)    | 44.50 (34.27, 57.53)             | 196.90 (164.23, 220.55) | 13.57 (11.36, 15.27) | 14.22 (11.98, 16.67)         | 283.58 (252.39, 316.30)  | 4.94 (4.33, 5.45)    |
| 2017 | 12.42 (9.22, 16.47)              | 481.13 (425.73, 543.43)    | 6.00 (5.32, 6.77)    | 43.98 (32.95, 58.15)             | 191.16 (156.86, 214.77) | 13.12 (10.70, 14.75) | 14.38 (11.95, 17.03)         | 267.14 (234.02, 296.28)  | 4.69 (4.05, 5.17)    |
| 2018 | 12.40 (9.15, 16.42)              | 452.81 (399.08, 516.02)    | 5.65 (4.98, 6.41)    | 45.12 (33.66, 59.45)             | 186.36 (152.19, 212.62) | 12.76 (10.37, 14.59) | 14.62 (12.13, 17.36)         | 253.44 (221.46, 283.12)  | 4.48 (3.86, 5.01)    |

| Year | <20 years (per 100,000 (95% UI)) |                         |                   | 70+ years (per 100,000 (95% UI)) |                         |                      | Total (per 100,000 (95% UI)) |                         |                   |
|------|----------------------------------|-------------------------|-------------------|----------------------------------|-------------------------|----------------------|------------------------------|-------------------------|-------------------|
|      | Incidence rate                   | DALY rate               | Mortality rate    | Incidence rate                   | DALY rate               | Mortality rate       | Incidence rate               | DALY rate               | Mortality rate    |
| 2019 | 12.51 (9.25, 16.44)              | 423.13 (372.68, 480.27) | 5.29 (4.64, 5.99) | 47.22 (35.21, 62.05)             | 182.11 (149.73, 208.93) | 12.42 (10.13, 14.37) | 14.98 (12.47, 17.82)         | 239.89 (208.93, 268.23) | 4.28 (3.68, 4.81) |



**Table 4 Incidence, DALY rate, Mortality rate of unintentional drowning at subnational level in 2019**

| Rank | Location       | Age-standardized Incidence rate per 100,000 (95% UI) | Rank | Location       | Age-standardized DALY rate per 100,000 (95% UI) | Rank | Location     | Age-standardized Mortality rate per 100,000 (95% UI) |
|------|----------------|------------------------------------------------------|------|----------------|-------------------------------------------------|------|--------------|------------------------------------------------------|
| -    | China          | 15.40 (12.77, 18.44)                                 | -    | China          | 187.83 (161.66, 211.52)                         | -    | China        | 3.97 (3.33, 4.51)                                    |
| 1    | Beijing        | 47.41 (36.71, 60.53)                                 | 1    | Xinjiang       | 428.68 (330.43, 502.71)                         | 1    | Sichuan      | 7.44 (5.30, 9.13)                                    |
| 2    | Jiangsu        | 27.75 (22.39, 33.08)                                 | 2    | Sichuan        | 315.47 (225.04, 382.15)                         | 2    | Hubei        | 7.13 (4.86, 8.72)                                    |
| 3    | Zhejiang       | 24.05 (19.83, 28.69)                                 | 3    | Hubei          | 300.35 (205.23, 367.27)                         | 3    | Xinjiang     | 6.54 (5.24, 7.60)                                    |
| 4    | Hong Kong      | 22.39 (18.02, 27.65)                                 | 4    | Jiangxi        | 289.66 (228.87, 334.40)                         | 4    | Hunan        | 6.36 (4.77, 7.48)                                    |
| 5    | Inner Mongolia | 22.36 (17.80, 27.75)                                 | 5    | Hunan          | 282.36 (213.03, 326.54)                         | 5    | Chongqing    | 6.19 (4.73, 7.50)                                    |
| 6    | Chongqing      | 22.24 (18.68, 26.25)                                 | 6    | Tibet          | 281.80 (220.56, 413.17)                         | 6    | Anhui        | 5.98 (4.28, 7.25)                                    |
| 7    | Hubei          | 21.57 (17.65, 26.35)                                 | 7    | Yunnan         | 270.65 (220.77, 329.34)                         | 7    | Jiangsu      | 5.59 (3.87, 7.03)                                    |
| 8    | Anhui          | 20.56 (16.96, 25.00)                                 | 8    | Chongqing      | 269.82 (206.74, 327.24)                         | 8    | Jiangxi      | 5.31 (4.14, 6.18)                                    |
| 9    | Shanghai       | 19.67 (16.09, 23.64)                                 | 9    | Anhui          | 255.13 (196.18, 300.79)                         | 9    | Yunnan       | 5.05 (4.17, 6.03)                                    |
| 10   | Macao          | 18.66 (14.95, 23.54)                                 | 10   | Hainan         | 249.00 (197.36, 303.93)                         | 10   | Guangxi      | 4.75 (3.89, 5.56)                                    |
| 11   | Sichuan        | 18.38 (15.02, 22.16)                                 | 11   | Guangxi        | 246.62 (208.07, 287.58)                         | 11   | Hainan       | 4.59 (3.57, 5.77)                                    |
| 12   | Hunan          | 15.82 (12.90, 19.15)                                 | 12   | Ningxia        | 223.95 (175.90, 279.34)                         | 12   | Zhejiang     | 4.46 (3.11, 5.33)                                    |
| 13   | Shaanxi        | 15.39 (12.72, 18.91)                                 | 13   | Guizhou        | 223.70 (180.05, 277.67)                         | 13   | Guizhou      | 4.28 (3.43, 5.28)                                    |
| 14   | Tianjin        | 14.63 (11.96, 17.77)                                 | 14   | Qinghai        | 210.91 (166.14, 273.81)                         | 14   | Tibet        | 4.28 (3.37, 6.32)                                    |
| 15   | Hainan         | 14.57 (11.99, 17.39)                                 | 15   | Jiangsu        | 206.97 (145.36, 250.24)                         | 15   | Ningxia      | 4.08 (3.15, 5.09)                                    |
| 16   | Fujian         | 14.35 (11.60, 17.47)                                 | 16   | Zhejiang       | 180.62 (131.58, 213.32)                         | 16   | Qinghai      | 3.65 (2.90, 4.69)                                    |
| 17   | Shanxi         | 14.02 (11.12, 17.42)                                 | 17   | Henan          | 166.74 (136.74, 203.35)                         | 17   | Fujian       | 3.23 (2.69, 3.91)                                    |
| 18   | Shandong       | 13.72 (11.31, 16.67)                                 | 18   | Fujian         | 154.61 (130.37, 189.01)                         | 18   | Henan        | 3.09 (2.53, 3.72)                                    |
| 19   | Jiangxi        | 13.53 (11.49, 15.93)                                 | 19   | Shandong       | 134.62 (112.79, 161.59)                         | 19   | Shandong     | 2.75 (2.25, 3.34)                                    |
| 20   | Guangdong      | 12.81 (10.43, 15.60)                                 | 20   | Guangdong      | 128.49 (108.87, 152.66)                         | 20   | Gansu        | 2.48 (2.07, 3.24)                                    |
| 21   | Ningxia        | 10.94 (8.93, 13.34)                                  | 21   | Gansu          | 125.87 (105.24, 168.41)                         | 21   | Guangdong    | 2.48 (2.08, 2.99)                                    |
| 22   | Liaoning       | 10.94 (8.65, 13.71)                                  | 22   | Shaanxi        | 119.56 (96.26, 153.43)                          | 22   | Shaanxi      | 2.39 (1.91, 3.03)                                    |
| 23   | Heilongjiang   | 10.79 (8.69, 13.39)                                  | 23   | Hebei          | 108.84 (84.48, 181.89)                          | 23   | Tianjin      | 2.30 (1.84, 2.80)                                    |
| 24   | Guangxi        | 10.49 (8.64, 12.34)                                  | 24   | Tianjin        | 108.58 (88.49, 130.44)                          | 24   | Shanghai     | 2.29 (1.87, 2.76)                                    |
| 25   | Henan          | 10.48 (8.52, 12.84)                                  | 25   | Heilongjiang   | 108.27 (85.10, 135.47)                          | 25   | Liaoning     | 2.22 (1.78, 2.81)                                    |
| 26   | Yunnan         | 9.29 (7.77, 10.98)                                   | 26   | Inner Mongolia | 104.09 (83.90, 136.64)                          | 26   | Heilongjiang | 2.20 (1.73, 2.79)                                    |
| 27   | Guizhou        | 8.44 (7.00, 9.97)                                    | 27   | Shanxi         | 101.60 (79.92, 146.26)                          | 27   | Shanxi       | 2.01 (1.56, 2.83)                                    |
| 28   | Xinjiang       | 8.30 (6.71, 10.20)                                   | 28   | Liaoning       | 100.79 (81.40, 124.99)                          | 28   | Hebei        | 1.97 (1.51, 3.28)                                    |

| Rank | Location | Age-standardized Incidence rate per 100,000 (95% UI) | Rank | Location  | Age-standardized DALY rate per 100,000 (95% UI) | Rank | Location       | Age-standardized Mortality rate per 100,000 (95% UI) |
|------|----------|------------------------------------------------------|------|-----------|-------------------------------------------------|------|----------------|------------------------------------------------------|
| 29   | Jilin    | 7.51 (5.78, 9.94)                                    | 29   | Shanghai  | 96.08 (78.52, 116.33)                           | 29   | Inner Mongolia | 1.95 (1.54, 2.58)                                    |
| 30   | Hebei    | 6.53 (5.10, 8.32)                                    | 30   | Jilin     | 58.33 (45.15, 90.75)                            | 30   | Hong Kong      | 1.34 (0.99, 1.96)                                    |
| 31   | Qinghai  | 5.86 (4.74, 7.23)                                    | 31   | Macao     | 56.28 (44.87, 71.99)                            | 31   | Macao          | 1.32 (1.02, 1.71)                                    |
| 32   | Tibet    | 5.27 (4.26, 6.61)                                    | 32   | Hong Kong | 49.95 (37.13, 70.45)                            | 32   | Jilin          | 1.24 (0.96, 1.95)                                    |
| 33   | Gansu    | 5.23 (4.21, 6.59)                                    | 33   | Beijing   | 39.66 (31.44, 68.64)                            | 33   | Beijing        | 0.68 (0.51, 1.31)                                    |

**Table 5 Change of Incidence, DALY rate, Mortality rate of unintentional drowning at subnational level, 1990-2019**

| Change of Incidence rate % (95% UI) |              |                         | Change of DALY rate % (95% UI) |                |                         | Change of Mortality rate % (95% UI) |                |                         |
|-------------------------------------|--------------|-------------------------|--------------------------------|----------------|-------------------------|-------------------------------------|----------------|-------------------------|
| Rank                                | Location     | Change                  | Rank                           | Location       | Change                  | Rank                                | Location       | Change                  |
| -                                   | China        | -31.23 (-36.85, -25.45) | -                              | China          | -74.89 (-78.44, -70.57) | -                                   | China          | -68.56 (-73.03, -63.46) |
| 1                                   | Tibet        | -57.80 (-61.37, -53.38) | 1                              | Shaanxi        | -82.16 (-87.04, -75.53) | 1                                   | Jiangxi        | -78.00 (-81.67, -72.96) |
| 2                                   | Shanghai     | -56.61 (-60.84, -50.56) | 2                              | Jiangxi        | -82.00 (-85.18, -77.95) | 2                                   | Shaanxi        | -77.62 (-83.24, -70.19) |
| 3                                   | Hebei        | -55.31 (-60.82, -47.85) | 3                              | Ningxia        | -80.05 (-85.52, -72.69) | 3                                   | Ningxia        | -74.52 (-80.96, -66.00) |
| 4                                   | Macao        | -54.53 (-59.44, -47.10) | 4                              | Anhui          | -79.80 (-84.30, -74.51) | 4                                   | Henan          | -73.10 (-79.39, -64.57) |
| 5                                   | Tianjin      | -50.77 (-55.29, -45.58) | 5                              | Henan          | -78.81 (-84.07, -71.35) | 5                                   | Anhui          | -72.84 (-78.63, -65.82) |
| 6                                   | Hong Kong    | -48.30 (-53.82, -41.29) | 6                              | Guizhou        | -77.49 (-83.06, -69.24) | 6                                   | Guizhou        | -71.43 (-78.26, -61.41) |
| 7                                   | Xinjiang     | -48.24 (-53.69, -42.06) | 7                              | Sichuan        | -76.94 (-81.97, -69.88) | 7                                   | Tibet          | -70.82 (-79.22, -59.34) |
| 8                                   | Gansu        | -47.14 (-53.59, -38.78) | 8                              | Jiangsu        | -76.89 (-82.11, -70.52) | 8                                   | Inner Mongolia | -70.31 (-78.76, -59.30) |
| 9                                   | Liaoning     | -46.68 (-53.08, -40.19) | 9                              | Chongqing      | -76.61 (-82.25, -69.35) | 9                                   | Chongqing      | -70.22 (-77.35, -61.39) |
| 10                                  | Qinghai      | -45.64 (-51.24, -39.40) | 10                             | Fujian         | -75.04 (-80.54, -68.11) | 10                                  | Jilin          | -69.84 (-77.03, -61.47) |
| 11                                  | Henan        | -43.60 (-52.43, -33.21) | 11                             | Zhejiang       | -74.53 (-79.95, -67.63) | 11                                  | Fujian         | -69.53 (-75.69, -62.19) |
| 12                                  | Heilongjiang | -41.18 (-47.86, -33.50) | 12                             | Inner Mongolia | -74.27 (-81.78, -64.04) | 12                                  | Macao          | -69.31 (-76.50, -60.19) |
| 13                                  | Ningxia      | -39.73 (-47.54, -31.56) | 13                             | Yunnan         | -74.25 (-81.62, -62.21) | 13                                  | Jiangsu        | -68.71 (-75.47, -60.23) |
| 14                                  | Guizhou      | -37.16 (-44.57, -28.11) | 14                             | Tibet          | -74.06 (-82.26, -62.45) | 14                                  | Sichuan        | -68.53 (-75.20, -59.47) |
| 15                                  | Hunan        | -35.95 (-43.00, -26.91) | 15                             | Hunan          | -73.67 (-78.73, -66.90) | 15                                  | Yunnan         | -67.88 (-76.43, -54.25) |
| 16                                  | Guangxi      | -35.51 (-42.88, -25.94) | 16                             | Gansu          | -73.61 (-80.74, -64.95) | 16                                  | Gansu          | -67.84 (-75.46, -58.02) |
| 17                                  | Jilin        | -35.12 (-44.82, -22.01) | 17                             | Macao          | -73.49 (-79.35, -65.10) | 17                                  | Qinghai        | -67.71 (-75.51, -56.48) |
| 18                                  | Jiangsu      | -34.90 (-42.61, -25.78) | 18                             | Qinghai        | -73.44 (-80.50, -63.10) | 18                                  | Zhejiang       | -66.73 (-73.89, -58.29) |
| 19                                  | Yunnan       | -34.85 (-41.36, -26.54) | 19                             | Jilin          | -72.80 (-79.35, -64.26) | 19                                  | Hunan          | -65.75 (-72.44, -57.98) |
| 20                                  | Shandong     | -34.15 (-41.69, -25.90) | 20                             | Hubei          | -70.08 (-76.65, -61.64) | 20                                  | Guangdong      | -65.13 (-72.41, -55.42) |
| 21                                  | Jiangxi      | -31.39 (-38.90, -21.49) | 21                             | Shandong       | -69.86 (-76.52, -62.13) | 21                                  | Heilongjiang   | -65.00 (-73.57, -54.03) |
| 22                                  | Sichuan      | -31.16 (-40.12, -22.03) | 22                             | Heilongjiang   | -68.71 (-76.66, -58.22) | 22                                  | Shandong       | -64.60 (-71.96, -55.31) |
| 23                                  | Fujian       | -30.19 (-39.11, -20.29) | 23                             | Guangxi        | -68.51 (-74.71, -61.05) | 23                                  | Beijing        | -64.22 (-73.39, -52.06) |
| 24                                  | Anhui        | -27.99 (-36.45, -18.87) | 24                             | Guangdong      | -68.49 (-75.57, -58.95) | 24                                  | Shanghai       | -63.20 (-70.69, -53.12) |
| 25                                  | Hainan       | -26.64 (-35.26, -15.55) | 25                             | Hainan         | -68.03 (-75.66, -57.53) | 25                                  | Hainan         | -62.40 (-71.57, -50.52) |
| 26                                  | Guangdong    | -25.75 (-34.14, -17.15) | 26                             | Shanghai       | -66.68 (-74.94, -55.28) | 26                                  | Guangxi        | -61.55 (-68.82, -53.00) |
| 27                                  | Zhejiang     | -24.70 (-33.89, -15.23) | 27                             | Hebei          | -64.09 (-73.58, -52.97) | 27                                  | Hubei          | -60.91 (-69.44, -50.70) |
| 28                                  | Hubei        | -22.19 (-31.65, -12.25) | 28                             | Xinjiang       | -63.43 (-71.12, -53.02) | 28                                  | Xinjiang       | -60.78 (-68.60, -50.72) |

| Change of Incidence rate % (95% UI) |                |                        | Change of DALY rate % (95% UI) |           |                         | Change of Mortality rate % (95% UI) |           |                         |
|-------------------------------------|----------------|------------------------|--------------------------------|-----------|-------------------------|-------------------------------------|-----------|-------------------------|
| Rank                                | Location       | Change                 | Rank                           | Location  | Change                  | Rank                                | Location  | Change                  |
| 29                                  | Shanxi         | -21.14 (-31.15, -9.96) | 29                             | Beijing   | -62.84 (-72.55, -50.06) | 29                                  | Hebei     | -59.01 (-69.42, -46.65) |
| 30                                  | Shaanxi        | -20.27 (-29.52, -9.16) | 30                             | Shanxi    | -62.65 (-73.19, -49.85) | 30                                  | Shanxi    | -57.59 (-68.72, -43.85) |
| 31                                  | Chongqing      | -14.43 (-23.68, -3.44) | 31                             | Tianjin   | -57.78 (-68.55, -44.58) | 31                                  | Tianjin   | -53.66 (-64.79, -40.72) |
| 32                                  | Beijing        | 17.59 (5.61, 33.79)    | 32                             | Hong Kong | -53.14 (-63.97, -38.82) | 32                                  | Hong Kong | -45.95 (-59.18, -28.32) |
| 33                                  | Inner Mongolia | 26.34 (11.03, 43.51)   | 33                             | Liaoning  | -45.84 (-62.35, -25.25) | 33                                  | Liaoning  | -43.55 (-59.97, -23.71) |

Table 6. The subnational mortality rate, DALY rate, incidence rate and related environmental risk factors - precipitation, surface water, coastline in 2019\*

| Province       | Mortality rate (per 10,000) | DALY rate (per 10,000) | Incidence rate (per 10,000) | Precipitation (mm) | Surface water Source (Billion cubic meters) | Coastline (km) |
|----------------|-----------------------------|------------------------|-----------------------------|--------------------|---------------------------------------------|----------------|
| Anhui          | 5.98                        | 255.13                 | 20.56                       | 935.8              | 482.1                                       | -              |
| Beijing        | 0.68                        | 39.66                  | 47.41                       | 506                | 8.6                                         | -              |
| Fujian         | 3.23                        | 154.61                 | 14.35                       | 1730.7             | 1362.5                                      | 3752           |
| Gansu          | 2.48                        | 125.87                 | 5.23                        | 362.1              | 312.2                                       | -              |
| Guangdong      | 2.48                        | 128.49                 | 12.81                       | 1993.6             | 2058.3                                      | 4114.4         |
| Guangxi        | 4.75                        | 246.62                 | 10.49                       | 1602.7             | 2103.8                                      | 1629           |
| Guizhou        | 4.28                        | 223.7                  | 8.44                        | 1246.1             | 1117                                        | -              |
| Hainan         | 4.59                        | 249                    | 14.57                       | 1594.4             | 249.3                                       | 1944           |
| Hebei          | 1.97                        | 108.84                 | 6.53                        | 442.7              | 51.4                                        | 487            |
| Henan          | 3.09                        | 166.74                 | 10.48                       | 529.1              | 105.8                                       | -              |
| Heilongjiang   | 2.2                         | 108.27                 | 10.79                       | 728.3              | 1305.7                                      | -              |
| Hubei          | 7.13                        | 300.36                 | 21.57                       | 893.5              | 583.4                                       | -              |
| Hunan          | 6.36                        | 282.36                 | 15.82                       | 1498.5             | 2091.2                                      | -              |
| Jilin          | 1.24                        | 58.33                  | 7.51                        | 679.3              | 437.4                                       | -              |
| Jiangsu        | 5.59                        | 206.97                 | 27.75                       | 798.5              | 163                                         | 954            |
| Jiangxi        | 5.31                        | 289.66                 | 13.53                       | 1710               | 2032.7                                      | -              |
| Liaoning       | 2.22                        | 100.79                 | 10.94                       | 687.2              | 211.5                                       | 2110           |
| Inner Mongolia | 1.95                        | 104.09                 | 22.36                       | 279.5              | 305.8                                       | -              |
| Ningxia        | 4.08                        | 223.95                 | 10.94                       | 345.7              | 10.3                                        | -              |
| Qinghai        | 3.65                        | 210.91                 | 5.86                        | 374                | 898.2                                       | -              |
| Shandong       | 2.75                        | 134.62                 | 13.72                       | 558.9              | 119.7                                       | 3345           |
| Shanxi         | 2.01                        | 101.6                  | 14.02                       | 458.1              | 58.5                                        | -              |
| Shaanxi        | 2.39                        | 119.56                 | 15.39                       | 759.4              | 469.7                                       | -              |
| Shanghai       | 2.29                        | 96.08                  | 19.67                       | 1389.2             | 40.9                                        | 213            |
| Sichuan        | 7.44                        | 315.47                 | 18.38                       | 953.2              | 2747.7                                      | -              |
| Tianjin        | 2.3                         | 108.58                 | 14.63                       | 436.2              | 5.1                                         | 153            |
| Xizang         | 4.28                        | 281.8                  | 5.27                        | 596.3              | 4496.9                                      | -              |
| Xinjiang       | 6.54                        | 428.68                 | 8.3                         | 174.7              | 829.7                                       | -              |
| Yunnan         | 5.05                        | 270.65                 | 9.29                        | 1008               | 1533.8                                      | -              |
| Zhejiang       | 4.46                        | 180.62                 | 24.05                       | 1950.3             | 1303                                        | 2218           |
| Chongqing      | 6.19                        | 269.82                 | 22.24                       | 1106.8             | 498.1                                       | -              |

\* Color Coding: Quintile method is used to assign color from dark to light according to the value from large to small
